# Supplementary material for: Ticks and tick-borne pathogens associated with dromedary camels (Camelus dromedarius) in northern Kenya
Source: Preprints.org preprint supplement (doi:10.20944/preprints202106.0170.v1), 2021-06-07
Supplement: Supplementary file 1 [file Table_S1.docx]

Table S1: Morphological and molecular identification of tick samples collected from camels in Marsabit, northern Kenya, February-March 2020

| Sample ID | Morphological ID | 12S rRNA (% homology, GenBank Accession) | 16S rRNA (% homology, GenBank Accession) | COI (% homology, GenBank Accession) | Consensus ID  (GenBank Accession)1 |
| --- | --- | --- | --- | --- | --- |
| T1 | *Hyalomma dromedarii* | *Hy. dromedarii* (99.7%, MH094484) | *Hy. dromedarii* (100%, MN960589) | *Hy. dromedarii* (100%, MT107484) | *Hy. dromedarii* (12S: MT895851; 16S: MT895169; COI: MT896151) |
| T108 | *Hyalomma dromedarii* | *Hy. dromedarii* (100%, MH094484 and KT391030) | *Hy. dromedarii* (100%, MN960589) | - | *Hy. dromedarii* (12S: MT895852; 16S: MT895170) |
| T120 | *Hyalomma dromedarii* | *Hy. dromedarii* (100%, MH094484 and KT391030) | *-* | - | *Hy. dromedarii* (12S: MT895853) |
| T208 | *Rhipicephalus pulchellus* | *Rh. pulchellus* (100% KY676841, AF150024) | *Rh. pulchellus* (100% MK774738) | - | *Rh. pulchellus* (12S: MT895854; 16S: MT895171) |
| T209 | *Rhipicephalus pulchellus* | *Rh. pulchellus* (100% KY676841, AF150024) | *Rh. pulchellus* (100% MK774738) | - | *Rh. pulchellus* (12S: MT895855; 16S: MT895172) |
| T275 | *Rhipicephalus camicasi* | *Rh. camicasi* (100% FJ536556, MH094506) | - | - | *Rh. camicasi* (12S: MT895856) |
| T281 | *Rhipicephalus camicasi* | *Rh. camicasi* (100% FJ536556, MH094506) | - | - | *Rh. camicasi* (12S: MT895857) |
| T303 | *Hyalomma impeltatum* | *Hy. impeltatum* (100% KX132904, MN315384) | *Hy. impeltatum* (100% MN394439) | *Hy. impeltatum* (99.2% KU130599) | *Hy. impeltatum* (12S: MT895858; 16S: MT895175; COI: MT896152) |
| T318 | *Hyalomma impeltatum* | *Hy. impeltatum* (100% KX132904, MN315384) | *Hy. impeltatum* (100% MN394439) | *Hy. impeltatum* (99.2% KU130599) | *Hy. impeltatum* (12S: MT895859; 16S: MT895176; COI: MT896153) |
| T362 | *Hyalomma rufipes* | *Hy. rufipes* (100% MN394460) | *Hy. rufipes* (100% MK737650, MK737649) | - | *Hy. rufipes* (12S: MT895860; 16S: MT895177) |
| T403 | *Hyalomma rufipes* | *Hy. rufipes* (100% MN394460) | *Hy. rufipes* (100% MK737650, MK737649) | *Hy. rufipes* (99.7% JX049282) | *Hy. rufipes* (12S: MT895861; 16S: MT895178; COI: MT896154) |
| T700 | *Amblyomma lepidum* | Am. lepidum (100% MK332385) | *Am. lepidum* (100% KP987777) | - | *Am. lepidum* (12S: MT895862; 16S: MT895179) |
| T708 | *Amblyomma lepidum* | - | *Am. lepidum* (100% MK737651) | - | *Am. lepidum* (16S: MT895180) |
| T710 | *Amblyomma gemma* | *Am. gemma* (99.7% KX377407) | *-* | - | *Am. gemma* (12S: MT895863) |
| T749 | *Amblyomma gemma* | *Am. gemma* (99.7% KX377407) | *-* | - | *Am. gemma* (12S: MT895864) |
| T852 | *Hyalomma truncatum* | *Hy. truncatum* (100% KU568497) | *Hy. truncatum* (99.4% KU130475) | - | *Hy. truncatum* (12S: MT895865; 16S: MT895181) |

1 accession numbers of samples deposited in GenBank as part of the present study
