# Supplementary material for: Ticks and tick-borne pathogens associated with dromedary camels (Camelus dromedarius) in northern Kenya
Source: Preprints.org preprint supplement (doi:10.20944/preprints202106.0170.v1), 2021-06-07
Supplement: Supplementary file 2 [file Table_S2.docx]

Table S2: Minimum infection rates for TBPs identified in ticks and camel blood samples according to sampling sites in Marsabit, northern Kenya, February-March 2020.

| **Location** | **Host** | **No. of individuals** | **No. of pools** | ***Coxiella burnetii*** | ***Coxiella* endo-symbionts** | ***Candidatus***  **Anaplasma camelii** | ***Anaplasma* sp.** | ***Candidatus* Ehrlichia regneryi** | ***Ehrlichia ruminantium*** | ***Ehrlichoia chaffeensis*** | ***Ehrlichia* sp.** | ***Rickettsia africae*** | ***Rickettsia aeschlimannii*** | ***Paracoccus* sp.** |
| --- | --- | --- | --- | --- | --- | --- | --- | --- | --- | --- | --- | --- | --- | --- |
| Laisamis | *Hy. dromedarii* | 320 | 76 | 4 (1.4%) |  | 9 (2.8%) |  | 8 (2.5%) |  |  |  |  | 1 (0.3%) | 2 (0.6%) |
|  | *Hy. rufipes* | 364 | 96 | 6 (1.6%) |  | 14 (3.8%) |  | 13 (3.6%) |  |  |  |  | 23 (6.3%) | 8 (2.2%) |
|  | *Hy. impeltatum* | 39 | 14 |  |  | 1 (2.6%) |  | 2 (5.1%) |  |  |  |  |  |  |
|  | *Hy. truncatum* | 3 | 2 |  |  |  |  |  |  |  |  |  |  | 1 (33.3%) |
|  | *Rh. camicasi* | 23 | 8 |  |  | 2 (8.7%) |  |  |  |  |  |  |  |  |
|  | Camel blood | 56 |  | 1 (1.8%) |  | 52 (92.9%) |  | 9 (16.1%) |  |  |  |  |  |  |
| Kamboe | *Hy. dromedarii* | 17 | 7 |  |  | 2 (11.8%) |  | 1 (5.9) |  |  |  |  |  |  |
|  | *Hy. rufipes* | 13 | 8 |  |  | 2 (15.4%) |  | 2 (15.4%) |  |  |  |  |  |  |
|  | *Am. gemma* | 19 | 12 |  | 1 (5.3%) | 2 (10.5%) |  |  | 2 (10.5%) |  |  | 1 (5.3%) |  |  |
|  | *Rh pulchellus* | 19 | 11 | 1 (5.3%) |  | 3 (15.8%) |  |  |  |  | 9 (47.4%) |  | 1 (5.3%) | 1 (5.3%) |
|  | *Hy. truncatum* | 2 | 1 |  |  |  |  |  |  |  |  |  |  |  |
|  | Camel blood | 16 |  |  |  | 16 (100%) |  | 1 (6.3%) |  |  |  |  |  |  |
| Shegel | *Hy. dromedarii* | 179 | 34 | 5 (2.8%) |  | 2 (1.1%) |  | 2 (1.1%) |  |  |  |  |  |  |
|  | *Hy. impeltatum* | 145 | 36 |  |  | 5 (3.4%) |  | 3 (2.1%) |  |  |  |  | 5 (3.4%) | 2 (1.4%) |
|  | *Hy. rufipes* | 87 | 27 | 3 (3.4%) |  | 4 (4.6%) |  | 5 (5.7%) |  |  |  |  | 9 (10.3%) |  |
|  | *Hy. truncatum* | 13 | 4 |  |  | 1 (7.7%) |  |  |  |  |  |  |  |  |
|  | *Rh. camicasi* | 38 | 10 |  |  | 3 (7.9%) |  |  |  |  |  |  |  |  |
|  | *Am. gemma* | 3 | 3 |  |  |  |  |  |  |  |  |  |  |  |
|  | *Am. lepidum* | 3 | 3 |  |  |  |  |  | 1 (33.3%) |  |  |  |  |  |
|  | Camel blood | 24 |  | 1 (4.2%) |  | 20 (83.3%) |  | 3 (12.5%) |  |  |  |  |  |  |
| Korr | *Hy. dromedarii* | 163 | 40 | 2 (1.2%) |  |  |  | 3 (7.5%) |  |  |  |  | 1 (0.6%) |  |
|  | *Hy. impeltatum* | 37 | 13 |  |  |  |  | 1 (0.7%) |  |  |  |  | 1 (2.7%) |  |
|  | *Hy. rufipes* | 145 | 43 | 3 (2,1%) |  | 1 (0.7%) |  | 9 (20.9%) |  |  | 1 (0.7%) |  | 22 (15.2%) |  |
|  | *Rh. pulchelus* | 2 | 1 |  |  |  |  |  |  |  |  |  |  |  |
|  | Camel blood | 56 |  | 7 (12.5%) |  | 49 (87.5%) |  | 13 (23.2%) |  |  |  |  |  |  |
| Dabel | *Hy. dromedarii* | 124 | 25 |  |  | 6 (4.8%) |  | 3 (2.4%) |  |  |  |  |  |  |
|  | *Hy. rufipes* | 39 | 15 |  |  | 2 (5.1%) |  | 5 (12.8%) |  |  |  |  | 8 (20.5%) |  |
|  | *Am. gemma* | 8 | 8 |  | 1 (12.5%) | 1 (12.5%) |  |  | 4 (50%) |  |  | 2 (25%) |  | 1 (12.5%) |
|  | *Am. lepidum* | 41 | 20 |  | 3 (7.3%) | 2 (4.9%) |  |  | 4 (9.8%) |  |  | 3 (7.3%) |  |  |
|  | *Rh. pulchellus* | 28 | 17 |  | 2 (7.1%) | 3 (10.7%) |  |  |  |  | 5 (17.9%) |  |  |  |
|  | Camel blood | 24 |  |  |  | 15 (62.5%) |  | 4 (16.7%) |  |  |  |  |  |  |
| Yaballo | *Hy. dromedarii* | 37 | 13 |  |  | 3 (8.1%) |  | 1 (2.7%) |  |  |  |  | 1 (2.7%) |  |
|  | *Hy. rufipes* | 22 | 10 |  |  | 2 (9.1%) |  | 7 (31.8%) |  |  |  |  | 3 (13.6%) |  |
|  | *Am. gemma* | 26 | 16 |  | 1 (3.8%) | 2 (7.7%) |  |  | 4 (15.4%) |  |  | 6 (23.1%) |  |  |
|  | *Am. lepidum* | 29 | 15 |  | 1 (3.4%) | 5 (17.2%) |  |  | 3 (10.3%) |  | 1 (3.4%) | 3 (10.3%) |  |  |
|  | *Rh. pulchellus* | 11 | 8 |  |  | 1 (9.1%) |  |  |  |  | 3 (27.3%) |  |  |  |
|  | *Rh. camicasi* | 3 | 3 |  |  | 1 (33.3%) |  |  |  |  |  |  | 1 (33.3%) |  |
|  | Camel blood | 24 |  |  |  | 14 (58.3%) |  |  |  |  |  |  |  |  |
| Bori | *Hy. dromedarii* | 15 | 10 |  |  | 1 (6.7%) |  | 1 (6.7%) |  |  |  |  |  |  |
|  | *Hy. rufipes* | 25 | 11 |  |  |  |  | 6 (24.0%) |  |  |  |  | 6 (24.0%) |  |
|  | *Am. gemma* | 29 | 16 |  | 5 (17.2%) | 2 (6.9%) |  |  | 2 (6.9%) |  |  | 1 (3.4%) |  |  |
|  | *Am. lepidum* | 7 | 5 |  | 1 (14.3%) | 1 (14.3%) |  |  |  |  |  | 1 (14.3%) |  |  |
|  | *Rh. pulchellus* | 21 | 12 |  |  |  |  |  |  |  | 2 (9.5%) |  | 2 (9.5%) |  |
|  | Camel blood | 24 |  |  |  | 16 (66.7%) |  | 3 (12.5%) |  |  |  |  |  |  |
| Gola | *Hy. dromedarii* | 18 | 10 |  |  | 1 (5.6%) |  | 2 (11.2%) |  |  |  |  |  |  |
|  | *Am. gemma* | 2 | 2 |  | 1 (50%) |  |  |  |  |  |  |  |  |  |
|  | *Am. lepidum* | 65 | 28 |  | 3 (4.6%) | 4 (6.2%) |  |  | 6 (9.2%) |  |  | 9 (13.8%) |  |  |
|  | *Hy. rufipes* | 26 | 16 |  |  | 1 (3.8%) |  |  |  |  |  |  | 5 (31.3%) |  |
|  | *Rh. pulchellus* | 5 | 4 |  | 1 (20.0%) |  |  |  |  |  |  |  | 1 (20.0%) |  |
|  | Camel blood | 24 |  |  |  | 13 (54.2%) |  | 3 (12.5%) |  |  |  |  |  |  |
| Misa | *Hy. dromedarii* | 13 | 4 |  |  |  |  |  |  |  |  |  |  |  |
|  | *Hy. rufipes* | 6 | 4 |  |  | 1 (16.7%) |  |  |  |  |  |  |  |  |
|  | *Hy. truncatum* | 4 | 2 |  |  |  |  |  |  |  |  |  | 1 (25%) |  |
|  | *Am. gemma* | 26 | 17 |  | 2 (7.7%) | 1 (3.8%) |  |  | 4 (15.4%) |  |  | 2 (7.7%) |  |  |
|  | *Am. lepidum* | 183 | 48 |  | 8 (4.4%) | 8 (4.4%) |  |  | 3 (1.6%) | 2 (1.1%) |  | 15 (8.2%) |  |  |
|  | *Rh. pulchellus* | 4 | 4 |  | 2 (50%) |  |  |  |  |  |  |  |  |  |
|  | Camel blood | 24 |  |  |  | 18 (75%) |  | 2 (8.3%) |  |  |  |  |  |  |
| Hula Hula | *Rh. camicasi* | 8 | 3 |  |  | 2 (25%) |  |  |  |  |  |  |  |  |
|  | *Am. gemma* | 4 | 4 |  |  | 3 (75%) |  |  |  |  |  | 1 (25%) |  |  |
|  | *Hy. dromedarii* | 1 | 1 |  |  |  |  |  |  |  |  |  |  |  |
|  | *Hy. rufipes* | 2 | 1 |  |  |  |  |  |  |  |  |  |  |  |
|  | *Rh. pulchellus* | 7 | 5 | 4 (57.1%) |  |  |  |  |  |  |  |  |  | 2 (28.6%) |
|  | Camel blood | 8 |  | 1 (12.5%) |  | 8 (100%) |  | 3 (37.5%) |  |  |  |  |  |  |
| Funanyatta | *Rh. pulchellus* | 4 | 4 |  | 1 (25.0%) |  |  |  |  |  | 1 (25.0%) |  |  |  |
|  | *Hy. dromedarii* | 7 | 4 |  |  | 1 (14.3%) |  |  |  |  |  |  |  |  |
|  | *Am. gemma* | 12 | 7 |  | 1 (8.3%) |  |  |  |  |  | 1 (8.3%) | 1 (8.3%) |  |  |
|  | *Hy. rufipes* | 21 | 8 |  |  |  |  |  |  |  |  |  | 5 (23.8%) |  |
|  | *Am. lepidum* | 2 | 1 |  |  |  |  |  |  |  |  |  |  |  |
|  | *Hy. truncatum* | 2 | 2 |  |  |  |  |  |  |  |  |  |  |  |
|  | Camel blood | 8 |  |  |  | 5 (62.5%) |  | 1 (12.5%) |  |  |  |  |  |  |
| Burgabo | *Hy. rufipes* | 60 | 15 |  |  | 1 (1.7%) | 1 (1.7%) | 1 (1.7%) |  |  |  |  | 6 (10.0%) |  |
|  | *Hy. dromedarii* | 25 | 9 |  |  |  |  |  |  |  |  |  |  |  |
|  | *Hy. truncatum* | 1 | 1 |  |  |  |  |  |  |  |  |  |  |  |
|  | *Rh. pulchellus* | 3 | 1 |  |  |  |  |  |  |  |  |  |  |  |
|  | Camel blood | 8 |  |  |  | 7 (87.5%) |  |  |  |  |  |  |  |  |
