# Supplementary material for: Ticks and tick-borne pathogens associated with dromedary camels (Camelus dromedarius) in northern Kenya
Source: Preprints.org preprint supplement (doi:10.20944/preprints202106.0170.v1), 2021-06-07
Supplement: Supplementary file 3 [file Table_S3.docx]

**Table S3:** Numbers of sampled camels and sheep with the same TBPs in ticks and blood, or in ticks or blood only, Marsabit, northern Kenya, February-March 2020.

| **Camels (n =296)** | | | |
| --- | --- | --- | --- |
| **Bacterial species** | **Same TBPs in ticks and in blood** | **TBPs in ticks only** | **TBPs in blood only** |
| *Ehrlichia ruminantium* | - | 31 (10.5%) | - |
| *Ehrlichia chaffeensis* | - | 2 (0.7%) | - |
| *Candidatus* Ehrlichia regneryi | 10 (3.4%) | 40 (13.5%) | 37 (12.5%) |
| *Ehrlichia* spp. | - | 16 (5.4%) | - |
| *Candidatus* Anaplasma camelii | 63 (21.3%) | 18 (6.1%) | 170 (57.4%) |
| *Anaplasma* spp | - | 1 (0.3%) | - |
| *Rickettsia africae* | - | 32 (10.8%) | - |
| *Rickettsia aeschlimannii* | - | 56 (18.9%) | - |
| *Coxiella burnetii* | 1 (0.3%) | 20 (6.8%) | 9 (3.0%) |
| *Coxiella* endosymbionts | - | 26 (8.8%) | - |
| **Sheep (n = 77)** | | | |
| *Ehrlichia ruminantium* | - | 3 (3.9%) | 1 (1.3%) |
| *Ehrlichia chaffeensis* | - | - | 1 (1.3%) |
| *Candidatus* Anaplasma camelii | - | 1 (1.3%) | - |
| *Anaplasma* *ovis* | 5 (6.5%) | 3 (3.9%) | 63 (81.8%) |
| *Rickettsia africae* | - | 3 (3.9%) | - |
| *Theileria ovis* | 1 (1.3%) | - | 61 (79.2%) |
